# Supplementary material
Source: publisher figshare collection journal article supplement (https://acs.figshare.com/ndownloader/files/3746050)
Supplement: Supplementary file 1 [file 3746050]

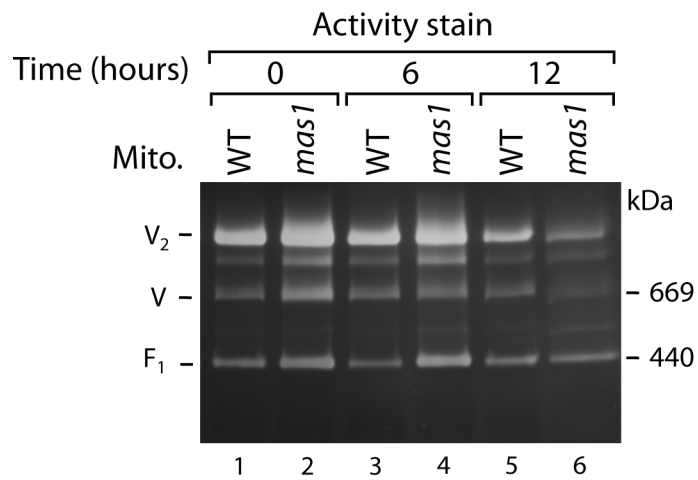

Figure S1, Burkhardt et al.

**Figure S1.** Mitochondrial ATPase activity staining of wild-type and *mas1* mitochondria. Mitochondria isolated from wild-type (WT) and *mas1* cells after growth at 24°C or 6 or 12 hours shift to 37°C were lysed in digitonin buffer and separated on BN-PAGE. The activity of the mitochondrial ATPase was visualized by in-gel calcium phosphate precipitation upon ATP hydrolysis.  $V_2$ ,  $F_1F_0$ -ATP synthase dimer;  $V$ ,  $F_1F_0$ -ATP synthase monomer;  $F_1$ ,  $F_1$  part of the ATP synthase.
